# Supplementary material
Source: PubMed Central journal article supplement (PMC3156347)
Supplement: NIHMS305963-supplement-2.pdf [file NIHMS305963-supplement-2.pdf]

**Supplementary Table 1.** Summary of clinical, cytogenetics and molecular results for three CML patients with loss of ‘normal’ ABL1 and TKI resistance

| Patient ID<br>Sex/Age       | Disease stage & treatment                                                                          | Karyotype                                                                                                                                      | FISH                                                                |                                                |                                                     | Mutation in<br>BCR-ABL1<br>domain |
|-----------------------------|----------------------------------------------------------------------------------------------------|------------------------------------------------------------------------------------------------------------------------------------------------|---------------------------------------------------------------------|------------------------------------------------|-----------------------------------------------------|-----------------------------------|
|                             |                                                                                                    |                                                                                                                                                | Chromosomes                                                         | D-FISH<br>(ABL1 and BCR)                       | ABL1 ex1b <sup>1</sup><br>ABL1 ex1a-11 <sup>2</sup> |                                   |
| Case 1<br>M 34              | Presentation 10/2007                                                                               | NA                                                                                                                                             | NA                                                                  | NA                                             | NA                                                  | NA                                |
|                             | No CyR on STI by 02/2008                                                                           | 46,XY,t(9;22)(q34;q11.2)[12]/<br>47,idem,+der(22)t(9;22)[3]                                                                                    | normal 9<br>der (9)t(9;22)<br>Ph<br>normal 22                       | (-)<br>ABL1-BCR<br>BCR-ABL1<br>BCR             | (-)<br>ABL1 ex1b<br>ABL1 ex1a-11<br>ND              | Not detected                      |
|                             | BMT 08/2008<br>CCyR & MR since 09/2008                                                             | 46,XY                                                                                                                                          | BCR-ABL1 negative                                                   |                                                |                                                     |                                   |
| Case 2<br>M 41              | Presentation 10/2001                                                                               | 46,XY,t(9;22)(q34;q11)[20]                                                                                                                     | normal 9<br>der (9)t(9;22)<br>Ph<br>normal 22                       | ABL1<br>ABL1-BCR<br>BCR-ABL1<br>BCR            | ABL1<br>ABL1 ex1b<br>ABL1 ex1a-11<br>ND             | NA                                |
|                             | 2001-2004 on INF, BU and STI<br>BP 04/2005<br>BMT 07/2005                                          | Partial cytogenetic response                                                                                                                   | Varying levels of BCR-ABL1 (+) BM cells with classical FISH pattern |                                                |                                                     | Not detected                      |
|                             | 2 <sup>nd</sup> BP post BMT 08/2005<br>Deceased 12/2005                                            | 49,XY,+8,t(9;22)(q34;q11),<br>del(9)(q31?q34),add(21)(q22),<br>+add(21)(q22),+der(22)t(9;22) [8]/<br>46,XX[3]                                  | normal 9<br>der (9)t(9;22)<br>Ph<br>normal 22                       | (-)<br>ABL1-BCR<br>BCR-ABL1 x 2<br>BCR         | (-)<br>ABL1 ex1b<br>ABL1 ex1a-11 x 2<br>ND          | Not detected                      |
| Case 3 <sup>3</sup><br>F 25 | Presentation 05/2004;<br>No response on STI<br>BP lymphoid 10/2004<br>BMT 11/2004 without MR       | 46,XX[20] <sup>1</sup><br><br><i>Masked Ph by FISH due to<br/>t(9;22;16)(q34;q11;q13)</i>                                                      | normal 9<br>der (9)t(9;22)<br>Ph<br>der(16)<br>normal 22            | ABL1<br>ABL1<br>BCR-ABL1<br>BCR<br>BCR         | ABL1<br>ABL1 ex1b<br>ABL1 ex1a-111<br>ND<br>ND      | NA                                |
|                             | Dasatinib 03/2005 with partial response<br>2 <sup>nd</sup> BP lymphoid 12/2005<br>Deceased 05/2006 | 46,XX,t(1;3)(p36;q21), del(3)(p1?3),<br>add(6)(p23), del(6) (q13q25),<br>add(9)(q34), del(10)(p13), -16,<br>add(18)(q23), +22 [cp6]/ 46,XX[94] | normal 9<br>der (9)t(9;22)<br>Ph<br>der(16)<br>normal 22            | ABL1 dim<br>ABL1-BCR<br>BCR-ABL1<br>BCR<br>BCR | ABL1 ex1b<br>ABL1 ex1b<br>ABL1 ex1a-11<br>ND<br>ND  | Y253H                             |

FISH was performed with dual color/dual probe BCR/ABL1 (D-FISH, Vysis) and with BACs covering the ABL1 gene and flanking regions on both metaphase and quiescent cells. The whole chromosome painting (WCP) for chromosomes 9 and 22 was performed to assess rearrangements; (<sup>1</sup>) BAC probe RP11-57C19 @ 132470366-132643828 covers ABL1 exon 1b (hg18); (<sup>2</sup>) BAC probe RP11-83J21 @ 132641829-132818294 covers ABL1 exons 1a-11 (hg18); NA-not available; (-) missing FISH signal indicating deletion; CyR – cytogenetic remission; CCyR - complete cytogenetic remission; MR – molecular remission; BMT – bone marrow transplant; INF- interferon; BU- bisulfon; STI – imatinib; BP- blast phase. Mutations in *BCR-ABL1* kinase domain were not detected by real time PCR in case 1 and 2, while a low level clone with Y253H mutant was present in case 3, which does not encode for resistance to dasatinib (1). [3] Published before (2).

1. Branford S, Melo JV, Hughes TP. Selecting optimal second-line tyrosine kinase inhibitor therapy for chronic myeloid leukemia patients after imatinib failure: does the BCR-ABL mutation status really matter? *Blood* 2009;114:5426-35.
2. Virgili A, Brazma D, Reid AG, Howard-Reeves J, Valganon M, Chanalaris A, et al. FISH mapping of Philadelphia negative BCR/ABL1 positive CML. *Mol Cytogenet* 2008;1:1-13.

**Supplementary Table 2.** FISH screening of ABL1 and BCR genes in Ph(+) CML-BP cell lines

| Cell lines    | Chromosomes    | ABL1 (ex1b) <sup>1</sup><br>ABL1 (ex1a-11) <sup>2</sup> | D-FISH (Vysis)<br>(ABL1 & BCR) | WCP<br>(9 and 22) |
|---------------|----------------|---------------------------------------------------------|--------------------------------|-------------------|
| <b>MC3</b>    | normal 9       | ABL1                                                    | ABL1                           | (+) <sup>3</sup>  |
|               | der (9)t(9;22) | (-)                                                     | (-)                            | (+)               |
|               | Ph             | ABL1 (ex1a-11) x 2                                      | BCR-ABL1 x 2                   | (+) x 2           |
|               | normal 22      | ND                                                      | BCR                            | (+)               |
| <b>EM2</b>    | normal 9       | (-)                                                     | (-)                            | (-)               |
|               | der (9)t(9;22) | ABL1 (ex1b) x 2                                         | ABL1-BCR x 2                   | (+) x 2           |
|               | Ph             | ABL1 (ex1a-11) x 4                                      | BCR-ABL1 x 4                   | (+) x 4           |
|               | normal 22      | ND                                                      | BCR                            | (+)               |
| <b>LAMA84</b> | normal 9       | (-)                                                     | (-)                            | (-)               |
|               | der (9)t(9;22) | ABL1 (ex1b) x 2                                         | ABL1-BCR x 2                   | (+) x 2           |
|               | Ph             | ABL1 (ex1a-11) x 4                                      | BCR-ABL1 x 4                   | (+) x 4           |
|               | normal 22      | ND                                                      | BCR                            | (+)               |
| <b>KU812</b>  | normal 9       | (-)                                                     | (-)                            | (-)               |
|               | der (9)t(9;22) | ABL1 (ex1b) x 2                                         | ABL1-BCR x 2                   | (+) x 2           |
|               | Ph             | ABL1 (ex1a-11) x 4 <sup>4</sup>                         | BCR-ABL1 x 4 <sup>4</sup>      | (+) x 4           |
|               | normal 22      | ND                                                      | BCR                            | (+)               |
| <b>BV173</b>  | normal 9       | (-)                                                     | (-)                            | (-) <sup>5</sup>  |
|               | der (9)t(9;22) | ABL1 (ex1b) x 2                                         | ABL1-BCR x 2                   | (+) x 2           |
|               | Ph             | ABL1 (ex1a-11) x 2                                      | BCR-ABL1 x 2                   | (+) x 2           |
|               | normal 22      | ND                                                      | BCR                            | (+)               |
| <b>KCL22</b>  | normal 9       | ABL1                                                    | ABL1                           | (+)               |
|               | der (9)t(9;22) | ABL1 (ex1b)                                             | ABL1-BCR                       | (+)               |
|               | Ph             | ABL1 (ex1a-11) x 2                                      | BCR-ABL1 x 2                   | (+) x 2           |
|               | normal 22      | ND                                                      | BCR                            | (+)               |

FISH was performed with dual color/dual probe BCR-ABL1 (D-FISH, Vysis) and with BACs covering the ABL1 gene and flanking regions using metaphase cells. The whole chromosome painting (WCP) for chromosomes 9 and 22 was performed to assess rearrangements; (<sup>1</sup>) BAC probe RP11-57C19 @ 132470366-132643828 covers ABL1 ex 1b (hg18); (<sup>2</sup>) BAC probe RP11-83J21 @ 132641829-132818294 covers ABL1 ex1a-11 (hg18); (<sup>3</sup>) 9p11-pter in 3 copies due to t(9;16); Ph – der(22)t(9;22); (<sup>4</sup>) Ph tandem duplication; ND- not done; (<sup>5</sup>) 9p11-pter in 2 copies due to t(8;9)(q24;p11); ND-not done; (-) missing FISH signal indicating deletion; (+) FISH signal present.

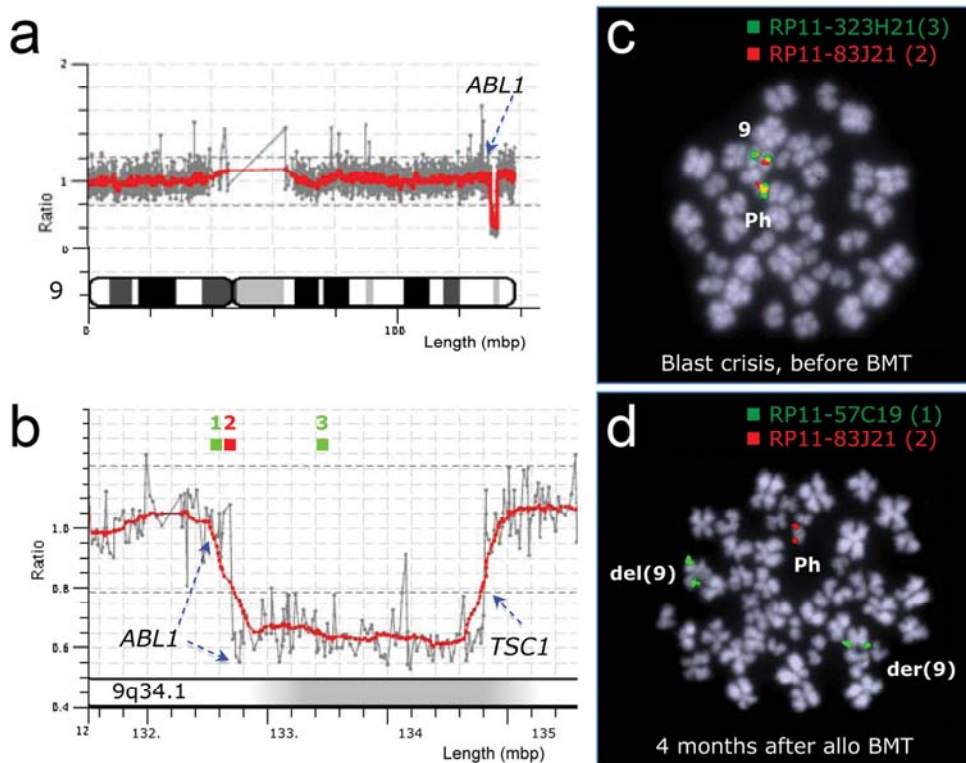

### Supplementary Figure 1

Deletion of the non-rearranged *ABL1* sequences in CML patient #3. A rare cryptic chromosome rearrangement was identified in this patient at presentation – a ‘masked Ph’ three way translocation described before(1). The patient did not achieve a complete cytogenetic remission on TKI treatment and eventually progressed to lymphoid blast crisis. Allogeneic bone marrow transplantation (BMT) was performed using a female sibling as a donor, but the patient relapsed 4 months later. (a) Array CGH profile of chromosome 9 showing deletion of the 9q34 region (arrow) developed during disease progression. The CGH was carried out using two BM samples of this patient taken at different time points: a sample obtained 4 months after BMT was tested against a blast crisis sample from the same patient before undergoing BMT, showing the appearance of the cryptic 9q34 deletion - i.e. the formation of the del(9) chromosome, in the former sample. (b) Close-up of the aCGH graph at the site of 9q34 deletion, highlighting the proximal breakpoint within *ABL1* and the distal breakpoint at *TSC1*. The deletion was estimated to be around 1.8 Mb long. The genome locations of the BAC probes used for FISH mapping are shown in green and red (1-3). (c) FISH on BM cells from the presentation blast crisis sample showed 2 signals from RP11-83J21 and RP11-323H21 on the normal 9 and an apparently ‘normal’ by G banding chromosome 22 (masked Ph). (d) FISH on BM cells collected 4 months after BMT, showed 2 signals from RP11-57C19 (5' *ABL1*) on both chromosomes 9 but only 1 signal from RP11-83J21 (3' *ABL1*) on the masked Ph (the expected signal on "normal" 9 is missing), confirming that the proximal breakpoint of the deletion falls within *ABL1* and validating the array results.

1. Virgili A, Brazma D, Reid AG, Howard-Reeves J, Valganon M, Chanalaris A, et al. FISH mapping of Philadelphia negative BCR/*ABL1* positive CML. *Mol Cytogenet* 2008;1:1-13.

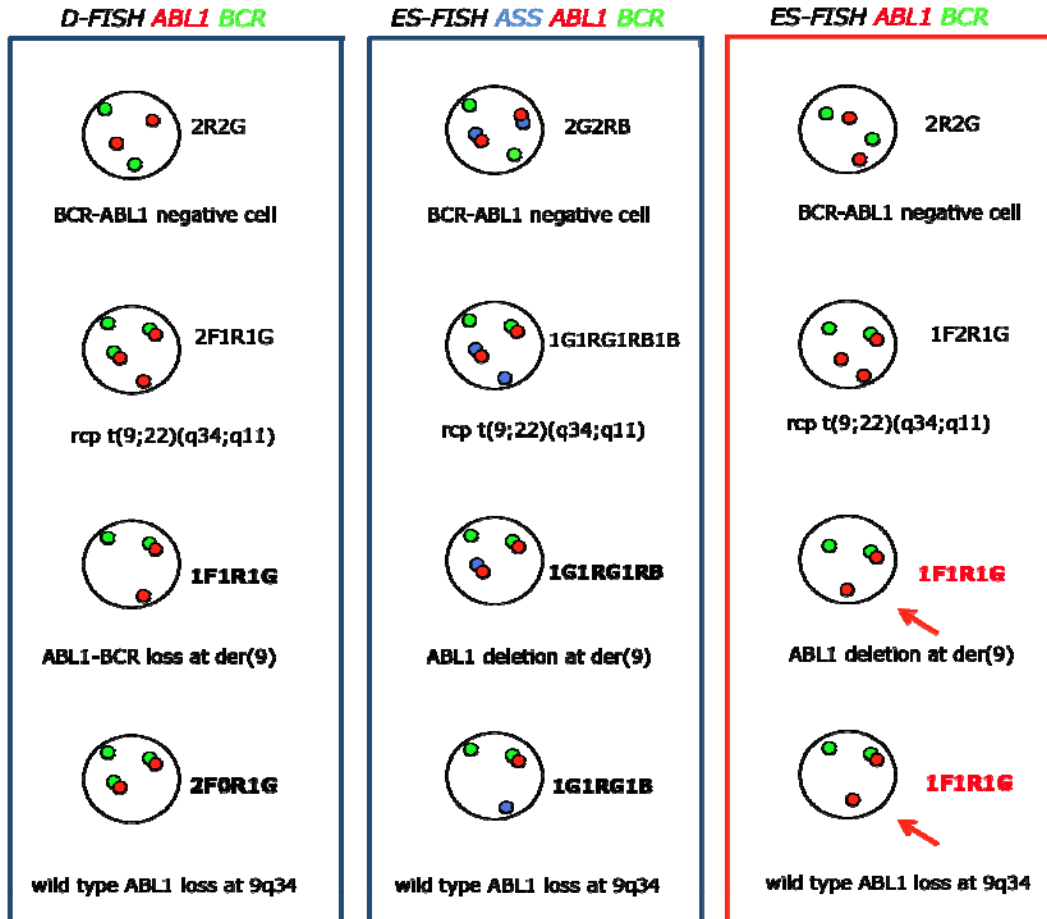

### Supplementary Figure 2

Diagrammatic presentation of FISH signal patterns in non-dividing cells (from top to bottom) that are *BCR-ABL1* negative, Ph-positive without deletion, Ph-positive with deletion at der(9) or at the normal 9 chromosome obtained using commercial *BCR-ABL1* FISH probe sets (Vysis) – dual fusion/two color (D-FISH) on the left, single fusion/tricolor (ASS/*ABL1*/*BCR*) in the middle and extra signal system (ES-FISH) - on the right. Red arrow points to the identical signal pattern produced by the ES-FISH probe in cases with *ABL1* deletion at der(9) and with deletion of the ‘wild’ non-translocated allele, which renders it unfit for diagnostic purposes.
